# Supplementary material for: Arsenic removal from Peruvian drinking water using milk protein nanofibril–carbon filters: a field study
Source: Royal Society of Chemistry journal article supplement (doi:10.1039/d1ew00456e), 2021-01-01
Supplement: d1ew00456e1.pdf [file d1ew00456e1.pdf]

## Electronic Supplementary Information (ESI)

### **Arsenic Removal from Peruvian Drinking Water by Milk Protein Nanofibril-Carbon Filters: A Field Study**

Sreenath Bolisetty, <sup>\*a,b</sup> Akram Rahimi, <sup>a,b</sup> and Raffaele Mezzenga <sup>\*a, c</sup>

<sup>a</sup>ETH Zurich, Department of Health Sciences and Technology, Schmelzbergstrasse 9, 8092 Zurich, Switzerland

<sup>b</sup>BluAct Technologies GmbH, Dufauxstrasse 57, 8152 Opfikon, Switzerland. email: sreenath@bluact.com. Telephone: +41 763456017

<sup>c</sup>ETH Zurich Department of Materials, Wolfgang-Pauli-Strasse 10, 8093 Zurich, Switzerland. email: raffaele.mezzenga@hest.ethz.ch. Telephone: +41 44 632 9140

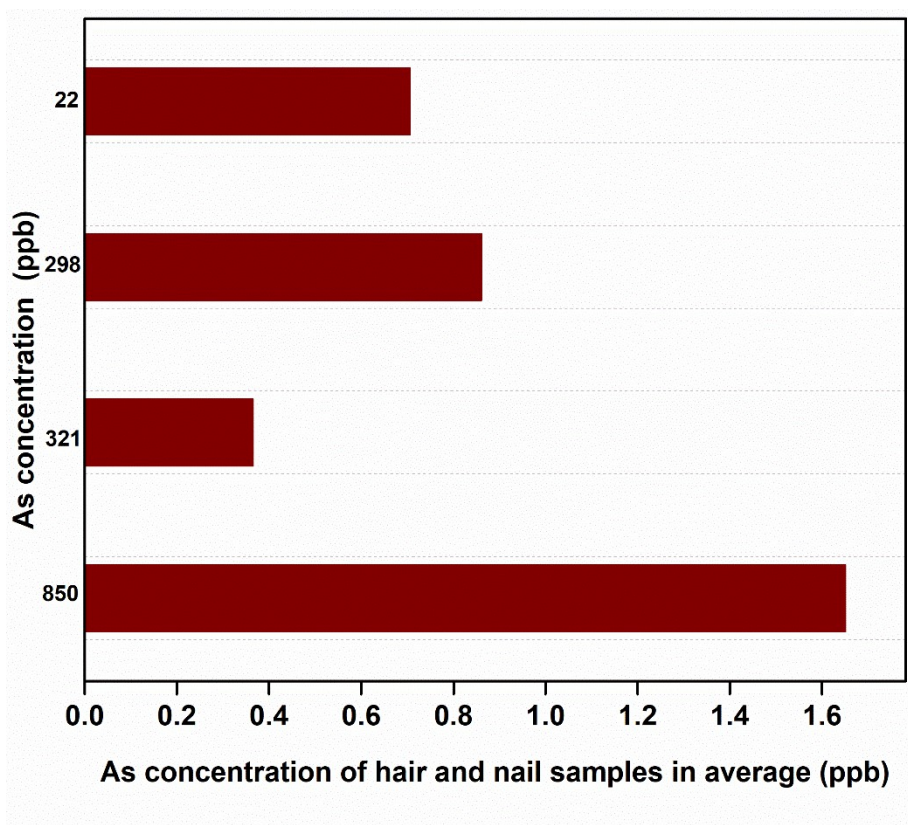

Fig. S1. Average of arsenic concentration in the hair and nails samples for the regions with different As concentrations.

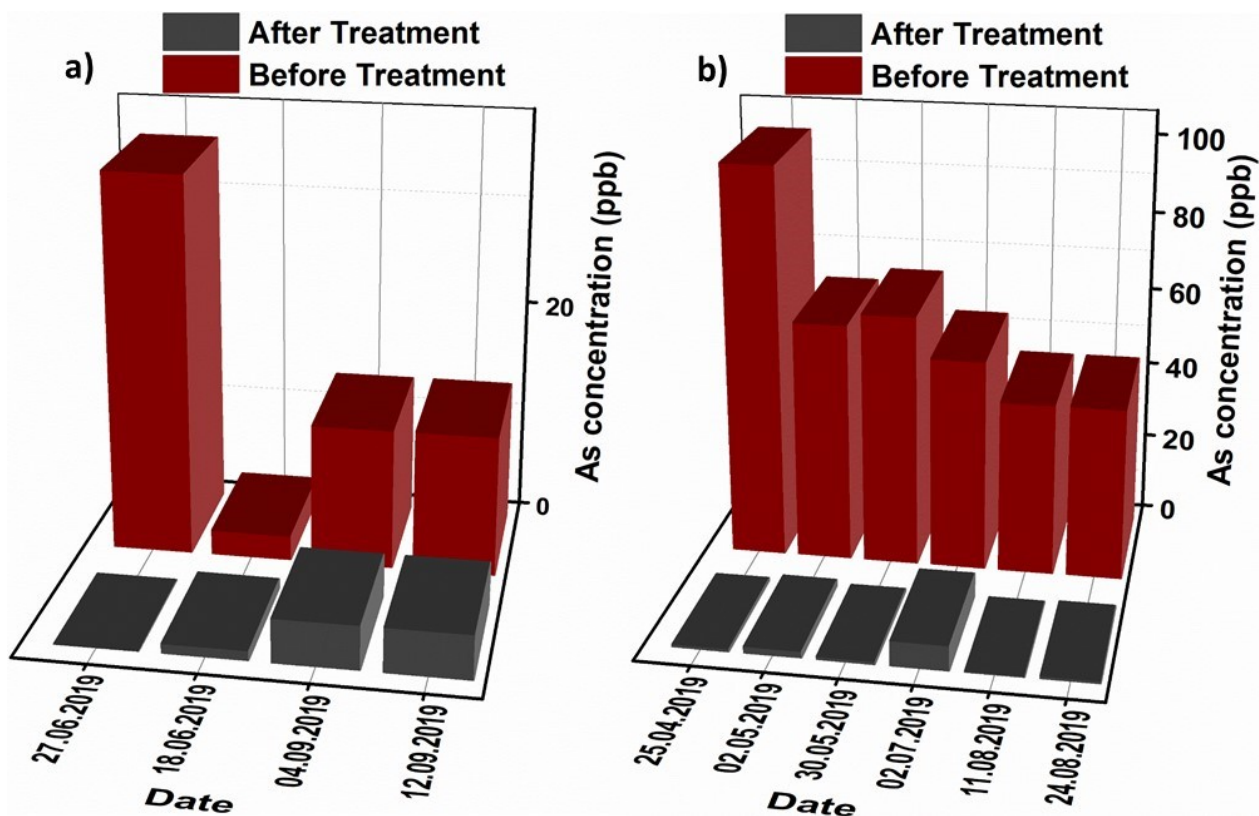

**Fig. S2.** Arsenic concentration before and after filtration through the Type I setup in a) Moguega (H24) and b) Chicalayo (H19). The performance was acceptable thought the entire study without the need of unit replacement.

**Table S1.** Houses with filter unit installation type and number of people using the unit for removing arsenic from tap drinking water.

| Code | Place         | Filtration unit type | Number of people |
|------|---------------|----------------------|------------------|
| H 1  | Tacna         | Type II              | 3                |
| H 2  | Tacna         | Type I               | 5                |
| H 3  | Tacna         | Type I               | 3                |
| H 5  | Tacna         | Type II              | 4                |
| H 6  | Ticapampa     | Type I               | 3                |
| H 7  | Ticapampa     | Type I               | 3                |
| H 9  | Ticapampa     | Type II              | 5                |
| H 10 | Ticapampa     | Type I               | 5                |
| H 11 | Inclan        | Type II              | 8                |
| H 12 | Inclan        | Type I               | 4                |
| H 13 | Inclan        | Type I               | 7                |
| H 14 | Inclan        | Type I               | 6                |
| H16  | Chiclayo      | Type II              | 10               |
| H17  | Chiclayo      | Type II              | 7                |
| H18  | Chiclayo      | Type II              | 4                |
| H19  | Chiclayo      | Type I               | 4                |
| H20  | Chiclayo      | Type II              | 6                |
| EPS  | TACNA         | Type III             | 6                |
| H21  | MOQUEGUA      | Type I               | 7                |
| H22  | MOQUEGUA      | Type II              | 9                |
| H23  | MOQUEGUA      | Type I               | 5                |
| H24  | MOQUEGUA      | Type II              | 6                |
| H25  | Cero De Pasco | Type II              | 4                |
| H26  | Cero De Pasco | Type II              | 6                |
| H27  | Cero De Pasco | Type I               | 6                |
| H28  | Cero De Pasco | Type I               | 4                |
| R1   | Inclan        | Type III             | community        |
| R2   | Torato        | Type III             | community        |

Table 2:

The physio-chemical parameters of the water before and after filtration is provided below

**Parameters measured in the field with portable equipment Household filters**

| FIELD PARAMETERS MEASURED WITH PORTABLE EQUIPMENT                                                                             |           |       |        |        |            |        |          |                |  |
|-------------------------------------------------------------------------------------------------------------------------------|-----------|-------|--------|--------|------------|--------|----------|----------------|--|
| USER H30                                                                                                                      |           |       |        |        |            |        |          |                |  |
| Location: Ticapampa Town Center:<br>East = 336,513, North = 8067064, Altitude = 1109<br>TYPE IV home filter<br>DATE: 05/11    |           |       |        |        |            |        |          |                |  |
| WATER                                                                                                                         | TURBIDITY | PH    | TEMP.  | MV     | CONDUCTIV. | TEMP.  | CHLORINE | FLOW           |  |
| WITHOUT FILTER (before)                                                                                                       | 0.23      | 9.55  | 25.7   | -142.5 | 2.03       | 24.8   |          |                |  |
| FILTERED (after)                                                                                                              | 0         | 9.5   | 25.4   | -139.1 | 2.04       | 24.4   |          | 0.019 Lt / sec |  |
| DATE: 12/17                                                                                                                   |           |       |        |        |            |        |          |                |  |
| WATER                                                                                                                         | TURBIDITY | PH    | TEMP.  | MV     | CONDUCTIV. | TEMP.  | CHLORINE | FLOW           |  |
| WITHOUT FILTER                                                                                                                | 0.17      | 8.99  | 23.4   | -105.5 | 2.05       | 24.3   | 0.3      |                |  |
| FILTERED                                                                                                                      | 0.02      | 9.05  | 2.3    | -111.7 | 2.07       | 23.7   | 0        | 0.019 Lt / sec |  |
| USER H31                                                                                                                      |           |       |        |        |            |        |          |                |  |
| Location: Poquera Inclán Town Center:<br>East = 339.331, North = 828637, Altitude = 448<br>TYPE IV home filter<br>DATE: 02/10 |           |       |        |        |            |        |          |                |  |
| WATER                                                                                                                         | TURBIDITY | PH    | TEMP.  | MV     | CONDUCTIV. | TEMP.  | CHLORINE | FLOW           |  |
| WITHOUT FILTER                                                                                                                | 0.95      | 8.15  | 21.4 ° | -62.5  | 2.41       | 20.6 ° | 0        |                |  |
| FILTERED                                                                                                                      | 0.88      | 7.87  | 21.4 ° | -46.3  | 2.4        | 20.9 ° | 0        | 0.047 Lt / sec |  |
| DATE: 05/11                                                                                                                   |           |       |        |        |            |        |          |                |  |
| WATER                                                                                                                         | TURBIDITY | PH    | TEMP.  | MV     | CONDUCTIV. | TEMP.  | CHLORINE | FLOW           |  |
| WITHOUT FILTER                                                                                                                | 0.65      | 10.86 | 24.6   | -215.1 | 2.43       | 24.2   | 0        |                |  |
| FILTERED                                                                                                                      | 0         | 10.41 | 24.6   | -194   | 2.44       | 25.3   | 0        | 0.047 Lt / sec |  |
| DATE: 12/16                                                                                                                   |           |       |        |        |            |        |          |                |  |
| WATER                                                                                                                         | TURBIDITY | PH    | TEMP.  | MV     | CONDUCTIV. | TEMP.  | CHLORINE | FLOW           |  |

**FIELD PARAMETERS MEASURED WITH PORTABLE EQUIPMENT**

|                       |      |      |      |        |      |      |   |                |  |
|-----------------------|------|------|------|--------|------|------|---|----------------|--|
| <b>WITHOUT FILTER</b> | 1.15 | 9.83 | 26.2 | -171.5 | 2.41 | 26.2 | 0 |                |  |
| <b>FILTERED</b>       | 0.03 | 9.82 | 26.4 | -149.5 | 2.4  | 26.3 | 0 | 0.047 lt / sec |  |

**USER H32**

Location: Inclán Town Center:  
East = 342,674, North = 8031991, Altitude = 512  
TYPE IV home filter

**DATE: 02/10**

| <b>WATER</b>          | <b>TURBIDITY</b> | <b>PH</b> | <b>TEMP.</b> | <b>MV</b> | <b>CONDUCTIV.</b> | <b>TEMP.</b> | <b>CHLORINE</b> | <b>FLOW</b>   |  |
|-----------------------|------------------|-----------|--------------|-----------|-------------------|--------------|-----------------|---------------|--|
| <b>WITHOUT FILTER</b> | 14.25            | 8.48      | 19.9 °       | -80.4     | 2.38              | 19.7 °       | 0               |               |  |
| <b>FILTERED</b>       | 2.02             | 8.48      | 20 °         | -79.9     | 2.4               | 20 °         | 0               | 0.02 lt / sec |  |

**DATE: 11/10**

| <b>WATER</b>          | <b>TURBIDITY</b> | <b>PH</b> | <b>TEMP.</b> | <b>MV</b> | <b>CONDUCTIV.</b> | <b>TEMP.</b> | <b>CHLORINE</b> | <b>FLOW</b>   |  |
|-----------------------|------------------|-----------|--------------|-----------|-------------------|--------------|-----------------|---------------|--|
| <b>WITHOUT FILTER</b> | 3.02             | 8.48      | 21.1         | -81.1     | 2.4               | 21.7         |                 |               |  |
| <b>FILTERED</b>       | 0.55             | 7.85      | 21.9         | -43.6     | 2.38              | 2.38         |                 | 0.02 lt / sec |  |

**DATE: 05/11**

| <b>WATER</b>          | <b>TURBIDITY</b> | <b>PH</b> | <b>TEMP.</b> | <b>MV</b> | <b>CONDUCTIV.</b> | <b>TEMP.</b> | <b>CHLORINE</b> | <b>FLOW</b>   |  |
|-----------------------|------------------|-----------|--------------|-----------|-------------------|--------------|-----------------|---------------|--|
| <b>WITHOUT FILTER</b> | 12.37            | 10.9      | 23.7         | -220.7    | 2.35              | 23.6         | 0               |               |  |
| <b>FILTERED</b>       | 0.17             | 10.84     | 23.4         | -215.2    | 2.35              | 23.6         | 0               | 0.02 lt / sec |  |

**DATE: 11/18**

| <b>WATER</b>          | <b>TURBIDITY</b> | <b>PH</b> | <b>TEMP.</b> | <b>MV</b> | <b>CONDUCTIV.</b> | <b>TEMP.</b> | <b>CHLORINE</b> | <b>FLOW</b>   |  |
|-----------------------|------------------|-----------|--------------|-----------|-------------------|--------------|-----------------|---------------|--|
| <b>WITHOUT FILTER</b> | 13.7             | 9.22      | 22.1         | -121.8    | 2.39              | 22           | 0               |               |  |
| <b>FILTERED</b>       | 1.23             | 9.4       | 22.2         | -131.7    | 2.42              | 21.9         | 0               | 0.02 lt / sec |  |

**DATE: 12/17**

| <b>WATER</b>          | <b>TURBIDITY</b> | <b>PH</b> | <b>TEMP.</b> | <b>MV</b> | <b>CONDUCTIV.</b> | <b>TEMP.</b> | <b>CHLORINE</b> | <b>FLOW</b>   |  |
|-----------------------|------------------|-----------|--------------|-----------|-------------------|--------------|-----------------|---------------|--|
| <b>WITHOUT FILTER</b> | 2.18             | 9.12      | 25.9         | -119.5    | 2.45              | 25.7         | 0               |               |  |
| <b>FILTERED</b>       | 0.5              | 9.99      | 25.5         | -135.2    | 2.4               | 24.2         | 0               | 0.02 lt / sec |  |

**USER H33**

Location: City of Tacna:  
East = 372,630, North = 8009618, Altitude = 687

| FIELD PARAMETERS MEASURED WITH PORTABLE EQUIPMENT |           |      |        |        |            |        |          |                |  |
|---------------------------------------------------|-----------|------|--------|--------|------------|--------|----------|----------------|--|
| TYPE IV home filter                               |           |      |        |        |            |        |          |                |  |
| DATE: 02/10                                       |           |      |        |        |            |        |          |                |  |
| WATER                                             | TURBIDITY | PH   | TEMP.  | MV     | CONDUCTIV. | TEMP.  | CHLORINE | FLOW           |  |
| WITHOUT FILTER                                    | 1.27      | 7.07 | 18.3 ° | -4.7   | 0.77       | 19.8 ° | 0.9      |                |  |
| FILTERED                                          | 0.93      | 7.13 | 19 °   | -3.9   | 0.61       | 19.4 ° | 0        | 0.015 lt / sec |  |
| DATE: 11/18                                       |           |      |        |        |            |        |          |                |  |
| WATER                                             | TURBIDITY | PH   | TEMP.  | MV     | CONDUCTIV. | TEMP.  | CHLORINE | FLOW           |  |
| WITHOUT FILTER                                    | 0.9       | 8.37 | 26.9   | -75.2  | 0.7        | 26.2   | 1.3      |                |  |
| FILTERED                                          | 0.2       | 8.57 | 26.2   | -87.8  | 0.83       | 27.4   | 0        | 0.015 lt / sec |  |
| DATE: 12/18                                       |           |      |        |        |            |        |          |                |  |
| WATER                                             | TURBIDITY | PH   | TEMP.  | MV     | CONDUCTIV. | TEMP.  | CHLORINE | FLOW           |  |
| WITHOUT FILTER                                    | 0.38      | 9.1  | 23.6   | -113.6 | 0.69       | 32     | 0.5      |                |  |
| FILTERED                                          | 0.02      | 9.04 | 26.8   | -112.9 | 0.75       | 29.5   | 0        | 0.015 lt / sec |  |

**Comment:** The measurements show flow rates that varied between 0.015 lt / sec and 0.04 lt / sec, which were the average operating flow rates of the first generations of filters. Subsequently, the researchers at the end of the validation and based on the efficiency results obtained in the laboratory, recommended a flow rate of 0.006 lt / sec, to obtain the maximum efficiency in the treatment.

| USER R1                                              |           |       |       |        |            |       |          |               |  |
|------------------------------------------------------|-----------|-------|-------|--------|------------|-------|----------|---------------|--|
| Location: Collective filter in Poquera Inclán Tacna: |           |       |       |        |            |       |          |               |  |
| East = 339,288, North = 8028545, Altitude = 456      |           |       |       |        |            |       |          |               |  |
| DATE: 11/10                                          |           |       |       |        |            |       |          |               |  |
| WATER                                                | TURBIDITY | PH    | TEMP. | MV     | CONDUCTIV. | TEMP. | CHLORINE | FLOW          |  |
| WITHOUT FILTER                                       | 0.71      | 8.12  | 22.2  | -62.1  | 2.43       | 23.8  | 0        |               |  |
| FILTERED                                             | 0.01      | 8.19  | 20.1  | -63.6  | 2.12       | 20.8  | 0        | 0.05 lt / sec |  |
| DATE: 05/11                                          |           |       |       |        |            |       |          |               |  |
| WATER                                                | TURBIDITY | PH    | TEMP. | MV     | CONDUCTIV. | TEMP. | CHLORINE | FLOW          |  |
| WITHOUT FILTER                                       | 0.59      | 11.2  | 24.48 | -236.2 | 2.44       | 25    | 0        |               |  |
| FILTERED                                             | 0         | 11.11 | 21.4  | -228.6 | 2.44       | 21.7  | 0        | 0.05 lt / sec |  |
| DATE: 12/16                                          |           |       |       |        |            |       |          |               |  |
| WATER                                                | TURBIDITY | PH    | TEMP. | MV     | CONDUCTIV. | TEMP. | CHLORINE | FLOW          |  |
| WITHOUT FILTER                                       | 1.27      | 9.88  | 2.3   | -166.3 | 2.43       | 26.2  | 0        |               |  |

| FIELD PARAMETERS MEASURED WITH PORTABLE EQUIPMENT                                                 |                  |           |              |           |                   |              |                 |               |  |
|---------------------------------------------------------------------------------------------------|------------------|-----------|--------------|-----------|-------------------|--------------|-----------------|---------------|--|
| <b>FILTERED</b>                                                                                   | 0.04             | 8.97      | 23.1         | -109.6    | 2.39              | 22.5         | 0               | 0.05 lt / sec |  |
| <b>USER R2</b>                                                                                    |                  |           |              |           |                   |              |                 |               |  |
| Location: Treatment Plant in Torata Moquegua:<br>East = 304,232, North = 8111220, Altitude = 2264 |                  |           |              |           |                   |              |                 |               |  |
| DATE: 11/10                                                                                       |                  |           |              |           |                   |              |                 |               |  |
| <b>WATER</b>                                                                                      | <b>TURBIDITY</b> | <b>PH</b> | <b>TEMP.</b> | <b>MV</b> | <b>CONDUCTIV.</b> | <b>TEMP.</b> | <b>CHLORINE</b> | <b>FLOW</b>   |  |
| <b>WITHOUT FILTER</b>                                                                             |                  | 7.76      | 25.7         | -40       | 0.67              | 26.3         | 0               |               |  |
| <b>FILTERED</b>                                                                                   |                  | 7.72      | 22.7         | -37.3     | 0.67              | 23.6         | 0.8             | 0.1 lt / sec  |  |
| Chlorinate the water after being filtered                                                         |                  |           |              |           |                   |              |                 |               |  |

Note: There are two temperature records because they have been measured with different instruments.
